# Supplementary material for: Gene annotation errors are common in the mammalian mitochondrial genomes database
Source: PubMed Central journal article supplement (PMC6341679; doi:10.1186/s12864-019-5447-1), 2019-01-22

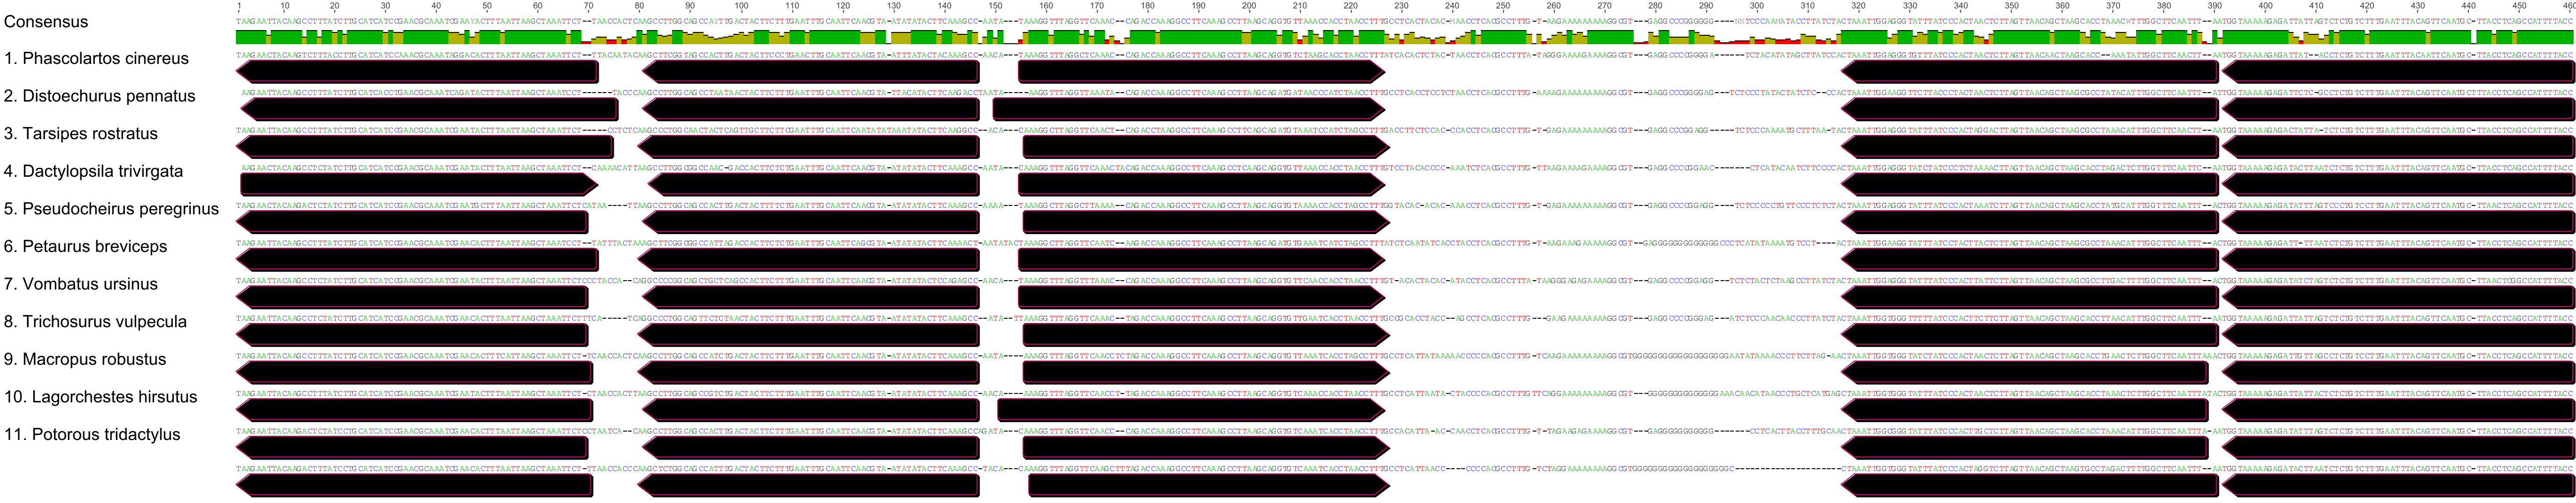

Supplement: 12864_2019_5447_MOESM3_ESM.pdf [file 12864_2019_5447_MOESM3_ESM.pdf]
